# Supplementary material for: Proteomic Analysis of Lysine Acetylation and Succinylation to Investigate the Pathogenicity of Virulent Pseudomonas syringae pv. tomato DC3000 and Avirulent Line Pseudomonas syringae pv. tomato DC3000 avrRpm1 on Arabidopsis thaliana
Source: Genes (Basel). 2024 Apr 16;15(4):499. doi: 10.3390/genes15040499 (PMC11050401; doi:10.3390/genes15040499)
Supplement: Supplementary file 1 [file genes-15-00499-s001.zip]

Archive with 11 entries (11 files):
- Supplementary FIG S1-4.pdf
- Table S1 Motif analysis of the detected lysine acetylation.xlsx
- Table S10 GO-based enrichment analysis of identified downregulated differentially modified Ksu proteins.xlsx
- Table S2 Motif analysis of the detected lysine succinylation.xlsx
- Table S3 GO enrichment analyses of the identified lysine acetylated.xlsx
- Table S4 GO enrichment analyses of the identified lysine succinylated.xlsx
- Table S5 Enrichment analysis of KEGG pathways associated with downregulated differentially modified Kac proteins.xlsx
- Table S6 Enrichment analysis of KEGG pathways associated with downregulated differentially modified Ksu proteins.xlsx
- Table S7 Protein domain enrichment analysis of acetylated proteins.xlsx
- Table S8 Protein domain enrichment analysis of succinylated proteins.xlsx
- Table S9 GO-based enrichment analysis of identified downregulated differentially modified Kac proteins.xlsx
