# Supplementary material for: Proteomic Analysis of Lysine Acetylation and Succinylation to Investigate the Pathogenicity of Virulent Pseudomonas syringae pv. tomato DC3000 and Avirulent Line Pseudomonas syringae pv. tomato DC3000 avrRpm1 on Arabidopsis thaliana
Source: Genes (Basel). 2024 Apr 16;15(4):499. doi: 10.3390/genes15040499 (PMC11050401; doi:10.3390/genes15040499)
Supplement: Supplementary file 1 [file genes-15-00499-s001.zip › Table S1 Motif analysis of the detected lysine acetylation.xlsx]

## Sheet: K.motif.model
Amino	-10	-9	-8	-7	-6	-5	-4	-3	-2	-1	K	1	2	3	4	5	6	7	8	9	10
A	4.41	4.46	2.36	1.95	5	5	5	1.88	5	5	0	-5	4.16	5	5	3.86	2.08	2.76	5	3.48	2.09
C	-2.5	-0.51	-1.17	-1.89	-3.22	-1.38	-0.19	-2.49	-0.47	-0.61	0	-5	-0.05	0.27	-1.45	-0.57	-1.87	-1.96	-2.89	-2.29	-2.28
D	0.15	0.21	-0.1	-0.19	-0.95	-0.12	-1.11	-0.81	-0.74	-3.12	0	-3.93	0.71	-0.55	-0.98	-3.11	-0.77	-0.71	-0.48	0.04	-0.14
E	0.1	-2.37	-1.08	-0.74	-0.57	-2.5	-2.38	-1.83	-2.55	-4.67	0	-5	-0.76	-5	-0.98	-0.46	-0.95	-3.22	-0.74	-1.56	-1.84
F	-0.43	0.81	0.83	-2.74	-0.34	-1.64	-0.03	2.07	2.6	5	0	4.39	-0.96	-0.05	-0.08	0.62	-0.06	-0.4	-0.68	0.63	0.22
G	3.59	1.44	5	3	3.62	2.21	3.61	1.27	3.58	5	0	-4.75	1.91	5	3.86	2.16	5	2.78	1.53	3.57	5
H	0	0.51	0.07	0.51	0.23	0.29	0.28	4.91	2.35	0.38	0	5	1.13	1.97	0	0.69	0.19	1.14	-0.29	-0.42	-0.04
I	2.59	0.1	-0.27	0.4	-0.93	-0.79	0.38	0.54	1.34	0.16	0	-5	0.91	2.28	0.61	-0.59	0.17	0.59	-0.21	0.07	-0.6
K	1.46	2.79	2.41	1.93	0.67	1.29	-1.78	-5	-5	-5	0	0.13	-2.56	-5	-0.32	2.1	1.18	2.81	1.22	3.14	5
L	-4.3	-2.32	-2.57	-3.15	-0.79	-0.35	-1.28	-1.06	-1.92	2.22	0	-5	-0.65	-0.44	-2.89	-1.83	-2.28	-1.18	-0.59	-4.27	-3.53
M	-0.41	-1.24	0.11	-0.59	-0.02	-1.56	-3.86	-5	-0.08	-5	0	-5	-0.72	-0.92	-0.86	-2.1	-0.42	-1.97	-0.26	-0.36	-0.25
N	-2.23	0.58	-3.04	0	0.38	0.26	2.82	2.87	2.2	2.51	0	5	2.69	0.1	-0.56	0.08	0	-1.54	-1.77	0.08	-0.21
P	0.1	0.73	0.71	-0.21	0.12	0.63	2.34	2.02	1.62	0.8	0	-5	-0.66	0.58	3.62	0.84	1.97	0.88	1.16	2.44	-0.08
Q	-0.02	-0.96	0	0.93	0.09	0.15	0.65	4.36	4.3	3.51	0	-4.48	-0.17	0.77	0.15	0.22	-1.09	-1.2	-0.02	-2.61	-0.43
R	0.78	0.83	0.15	0.24	0.35	-1	-1.11	-4.79	-5	-5	0	5	0.87	-0.03	-0.42	0.19	1.57	1.86	1.63	0.77	-0.03
S	-5	-5	-3.51	-4.58	-3.64	-5	-5	-4.04	-5	-5	0	0.92	-5	-5	-5	-4.92	-5	-5	-5	-5	-5
T	-0.68	0.2	-0.14	0.93	0.14	2.81	1	1.2	-0.04	1.18	0	0.1	0.67	0.14	0.82	0.69	-0.2	0.69	-0.06	0.26	0.67
V	0.78	0.09	0.33	1.65	0.62	0.66	1.08	2.8	0.39	2.71	0	-5	-1.56	0.05	1.27	-0.27	-1	0.5	0.41	0.47	0.08
W	0.03	-0.32	-0.52	0.45	-0.51	-1.51	-0.68	0.53	0.81	0	0	-1.02	-0.26	0.12	-1.51	0.22	-0.03	0	0.27	-0.06	0
Y	0.96	0.19	0.8	0.04	0.22	3.46	2.24	2.45	5	5	0	5	4.76	5	3.83	2.34	4.85	2.07	2.76	0.74	2.76
