# Supplementary material for: Proteomic Analysis of Lysine Acetylation and Succinylation to Investigate the Pathogenicity of Virulent Pseudomonas syringae pv. tomato DC3000 and Avirulent Line Pseudomonas syringae pv. tomato DC3000 avrRpm1 on Arabidopsis thaliana
Source: Genes (Basel). 2024 Apr 16;15(4):499. doi: 10.3390/genes15040499 (PMC11050401; doi:10.3390/genes15040499)
Supplement: Supplementary file 1 [file genes-15-00499-s001.zip › Table S3 GO enrichment analyses of the identified lysine acetylated.xlsx]

## Sheet: all
GO Terms Level 1	GO Terms Description	GO Terms Level	GO Terms ID	Mapping	Background	All Mapping	All Background	Fold Enrichment	Fisher' exact test P value	-log10(p value)	Related Protein
Cellular Component	cytosolic ribosome	10	GO:0022626	95	119	657	1303	1.58	4.04459e-12	11.39	P54609 P49200 Q9T043 Q9C5C2 Q9FZ76 P51413 P49692 P51414 Q9ZUT9 Q8LD46 Q9SGA6 Q9SF53 Q9M0E2 P16181 Q9FKZ4 P60040 Q8LBI1 Q9LJE4 Q680P8 O04603 Q8LD03 Q42064 P49209 Q9LY66 Q42112 Q9CAV0 Q9C9C6 Q9LRX8 Q940B0 Q9LYK9 P56798 P37702 Q9LXG1 P49690 Q9SQI8 P56791 P49201 Q9SR73 Q8RXU5 Q94K97 O81148 Q9FE65 Q9C8P0 O22795 P17094 Q9SKZ3 Q9C4Z6 O22860 P16180 Q8VZB9 P51427 Q8LC83 Q93VT9 Q9LRR9 P61845 P21238 P21240 …
	cytosolic part	9	GO:0044445	100	129	657	1303	1.54	2.83276e-11	10.55	P54609 P49200 Q9SLA8 Q9T043 Q9C5C2 Q9FZ76 P51413 P49692 P51414 Q9ZUT9 Q8LD46 Q9SGA6 Q9SF53 Q9M0E2 P16181 Q9FKZ4 P60040 Q8LBI1 Q9LJE4 Q680P8 O04603 Q8LD03 Q42064 P49209 Q9LY66 Q42112 Q9CAV0 Q9C9C6 Q9LRX8 Q940B0 Q9LYK9 P56798 Q9SF16 P37702 Q9LXG1 P49690 Q9SQI8 P56791 P49201 Q9SR73 Q8RXU5 Q9C9C4 Q94K97 O81148 P28769 Q9FE65 Q9C8P0 O22795 P17094 Q9SKZ3 Q9C4Z6 O22860 P16180 Q8VZB9 P51427 Q8LC83 Q93VT9 …
	ribosomal subunit	9	GO:0044391	78	101	657	1303	1.53	8.42217e-09	8.07	P49200 Q9T043 P56797 Q9FZ76 P51413 P49692 P51414 Q9ZUT9 Q8LD46 Q9SGA6 Q9SF53 Q9M0E2 P16181 Q9FKZ4 P60040 Q8LBI1 Q680P8 Q8LD03 Q42064 P49209 Q9LY66 Q9CAV0 Q9C9C6 Q9LRX8 Q940B0 Q9LYK9 P56798 Q9LXG1 P49690 Q9XJ27 P56791 P49201 Q9SR73 Q8RXU5 Q9LK61 Q94K97 Q9FE65 P17094 O22795 Q9SKZ3 P36212 O22860 P16180 Q8VZB9 P51427 Q8LC83 Q93VT9 P25864 P61845 Q9ZQ18 P42798 Q93VG5 P51422 P49211 Q9LHP1 P56808 Q9M339 …
	cytosolic large ribosomal subunit	11	GO:0022625	44	50	657	1303	1.75	1.28722e-08	7.89	P61845 Q9T043 Q9ZQ18 Q9FZ76 P51413 P49692 P51414 P51422 Q8LD46 P49211 Q9SF53 Q9LHP1 Q9M0E2 Q9SRX2 P51419 Q9FKZ4 P60040 Q8LBI1 Q8LFH7 Q42064 P49209 Q9FDZ9 Q9LY66 Q9C9C6 Q9LRX8 Q9FF52 Q940B0 P49690 Q9STR1 P56791 Q8RXU5 Q9M9W1 Q9FE65 Q9LR33 P38666 P17094 O22795 Q9M385 O22860 O82204 Q9LZH9 Q8VZB9 Q93VT9 Q9LZ57
	large ribosomal subunit	10	GO:0015934	47	57	657	1303	1.64	3.03643e-07	6.52	P25864 P61845 Q9T043 Q9ZQ18 Q9FZ76 P51413 P49692 P51414 P51422 Q8LD46 P49211 Q9SF53 Q9LHP1 Q9M0E2 Q9SRX2 P51419 Q9FKZ4 P60040 Q8LBI1 Q8LFH7 Q42064 P49209 Q9FDZ9 Q9LY66 Q9C9C6 Q9LRX8 Q9FF52 Q940B0 P49690 Q9STR1 P56791 Q8RXU5 Q9FY50 Q9M9W1 Q9FE65 Q9LR33 P38666 P17094 O22795 P36212 Q9M385 O22860 O82204 Q8VZB9 Q9LZH9 Q93VT9 Q9LZ57
	photosystem	9	GO:0009521	30	37	657	1303	1.61	9.53961e-05	4.02	Q9S714 P56767 Q9SHE8 Q9XF89 P49107 Q9S7H1 P56777 P27202 P23321 Q07473 Q9XFT3 Q9S841 P56761 Q9S7M0 Q9SY97 Q9XF88 Q9SGH4 P82538 P56778 Q9SUI6 F4JM05 P56766 Q9SHR7 Q9LMQ2 Q39142 Q42029 Q9S831 Q41932 Q8VZ87 A0A1P8B6D0
	plastoglobule	12	GO:0010287	23	27	657	1303	1.69	0.000159986	3.8	Q9S714 Q9SHE8 Q944G9 Q9XF89 Q9S7H1 P23321 Q07473 Q9ZU52 Q9S841 Q9S7M0 Q9XJ36 Q9SY97 Q9XF88 Q9SUI6 Q9SHR7 Q96242 Q9LMQ2 P10896 Q39142 Q9SJU4 Q9LW57 Q8VZ87 Q9S831
	photosystem I	10	GO:0009522	18	20	657	1303	1.78	0.000210152	3.68	Q9S714 P56767 Q9SHE8 Q9XF89 P49107 Q9S7H1 Q07473 Q9S7M0 Q9SY97 Q9XF88 Q9SUI6 Q9SHR7 P56766 Q9LMQ2 Q39142 Q8VZ87 Q9S831 A0A1P8B6D0
Molecular Function	structural constituent of ribosome	3	GO:0003735	93	122	705	1447	1.56	8.75472e-11	10.06	Q9FLN4 P49200 Q9SKX4 Q9T043 P56797 F4KGU2 Q9FZ76 P51413 F4JUQ4 P51414 Q9ZUT9 Q8LD46 Q9SGA6 Q9SF53 P92959 Q9M0E2 P16181 Q9FKZ4 P60040 Q8LBI1 Q680P8 O04603 Q8LD03 Q42064 P49209 Q9LY66 Q9CAV0 Q9C9C6 Q9LRX8 Q940B0 Q9LYK9 P56798 Q9LXG1 P49690 Q9XJ27 P56791 P49201 Q9SR73 Q8RXU5 Q9LK61 Q9FE65 O22795 P17094 Q9SKZ3 P36212 O22860 F4JWM1 Q9ASV6 A0A1P8AY36 P16180 Q8VZB9 P51427 Q8LC83 Q93VT9 P25864 P61845 A0A…
	chlorophyll binding	5	GO:0016168	14	14	705	1447	2.05	3.97252e-05	4.4	Q9S7M0 P56767 Q9SY97 Q9XF88 Q9XF89 P56778 P56766 Q9SHR7 Q9LMQ2 P56777 Q07473 Q39142 Q8VZ87 P56761
	tetrapyrrole binding	4	GO:0046906	31	41	705	1447	1.55	0.000345851	3.46	A0A1P8AWT7 Q9SHG8 P56767 A8MRF4 P56771 Q9XF89 Q9SK39 Q9LW27 P56777 Q07473 Q39161 P24101 Q9SMU8 P56761 Q42342 Q9LZ66 Q9S7M0 Q9SY97 Q9XF88 F4HU93 P56778 P56766 Q9SHR7 Q96242 Q9LMQ2 F4JFY4 P56773 Q39142 A0A1P8B564 Q8VZ87 A0A1P8APU0
	pigment binding	3	GO:0031409	9	9	705	1447	2.05	0.00150676	2.82	Q9S7M0 Q9SY97 Q9XF88 Q9XF89 Q9SHR7 Q9LMQ2 Q07473 Q39142 Q8VZ87
	sulfur compound binding	3	GO:1901681	12	15	705	1447	1.64	0.013342	1.87	O80852 P46421 P57752 P46416 P46422 F4IWV2 P42760 Q96266 Q9FFT4 P42761 Q9LF46 Q9SRY5
	organic anion transmembrane transporter activity	7	GO:0008514	5	5	705	1447	2.05	0.0272542	1.56	Q9C5M0 P40941 P31167 Q9M8L9 Q9ZV24
	kinase binding	5	GO:0019900	5	5	705	1447	2.05	0.0272542	1.56	Q9ASS6 O24456 Q9LV28 Q9C4Z6 Q8GW78
	single-stranded RNA binding	6	GO:0003727	8	10	705	1447	1.64	0.0456994	1.34	O23174 Q9FKW6 Q8W493 P83484 P23321 Q9SZJ5 Q42029 Q9S841
Biological Process	defense response to bacterium	7	GO:0042742	46	61	686	1393	1.53	1.85807e-05	4.73	P31265 Q9LM66 O23628 Q96291 Q8LPS2 P27140 Q9LXC9 Q8W493 Q9SRZ6 O80934 P42760 P23321 P24101 Q9SRY5 Q43316 P25697 P46283 Q9LJG3 Q9FKW6 P10896 P24704 Q9LW57 Q9SUR0 P22953 Q9LNV5 Q9SCX3 O80852 Q39258 P43082 Q9LUV2 P46422 Q42529 Q42139 Q9FX54 Q949U7 Q9SMU8 P36212 Q9ZR03 Q96266 Q93VP3 P46309 Q9FJR0 Q42029 O04203 Q9LRR9 O49006
	ribosomal large subunit biogenesis	6	GO:0042273	18	20	686	1393	1.83	0.000143448	3.84	Q9C9C6 Q9FF52 P61845 Q9ZQ18 Q9FZ76 P49692 Q9SH88 Q8LD46 P38666 Q9SF53 Q9LHP1 Q8LBI1 P60040 O04603 Q8VZB9 Q9LZH9 Q93VT9 Q9LY66
	response to jasmonic acid	6	GO:0009753	12	13	686	1393	1.87	0.00138355	2.86	O04309 P38418 Q9LJR2 P46416 Q9C9D0 Q96242 P10896 Q9FZA2 P46309 Q9FJR0 Q9FWR4 Q9ZV24
	photosynthesis, light harvesting in photosystem I	7	GO:0009768	9	9	686	1393	2.03	0.00165851	2.78	Q9S7M0 Q9SY97 Q9XF88 Q9XF89 Q9SHR7 Q9LMQ2 Q07473 Q39142 Q8VZ87
	response to red light	7	GO:0010114	7	7	686	1393	2.03	0.00691563	2.16	P10796 Q9XF88 Q07473 Q8H110 P10795 Q9XF89 Q9SHR7
	photosynthesis, light harvesting	6	GO:0009765	11	13	686	1393	1.72	0.00947287	2.02	Q9S7M0 Q9SY97 Q9XF88 Q39102 Q9FH02 Q9XF89 Q9SHR7 Q9LMQ2 Q07473 Q39142 Q8VZ87
	response to ozone	6	GO:0010193	6	6	686	1393	2.03	0.0141058	1.85	Q9FGY9 P46309 P24704 Q9LW57 Q9FWR4 O78310
	response to zinc ion	6	GO:0010043	10	12	686	1393	1.69	0.0166113	1.78	P93819 O80852 P46422 Q9FVT2 O50008 Q9SRZ6 P48491 Q39101 Q42112 Q9FWR4
	response to blue light	6	GO:0009637	7	8	686	1393	1.78	0.0316093	1.5	P10796 Q9XF88 Q07473 Q8H110 P10795 Q9XF89 Q9SHR7
	organic anion transport	7	GO:0015711	7	8	686	1393	1.78	0.0316093	1.5	Q9C5M0 Q9S7I3 P40941 P31167 A0A1P8B966 Q9M8L9 Q9ZV24
	toxin catabolic process	6	GO:0009407	10	13	686	1393	1.56	0.0404061	1.39	Q8L7C9 O80852 P46421 Q9FE46 P46422 P42760 Q96266 Q96324 P42761 Q9SRY5
	seedling development	6	GO:0090351	8	10	686	1393	1.62	0.0489834	1.31	O24456 Q8RWV9 Q9C4Z6 Q9SI75 F4JL28 Q9FLT0 P53492 Q9LV28
	seed germination	7	GO:0009845	8	10	686	1393	1.62	0.0489834	1.31	O24456 Q8RWV9 Q9C4Z6 Q9SI75 F4JL28 Q9FLT0 P53492 Q9LV28
