# Supplementary material for: Proteomic Analysis of Lysine Acetylation and Succinylation to Investigate the Pathogenicity of Virulent Pseudomonas syringae pv. tomato DC3000 and Avirulent Line Pseudomonas syringae pv. tomato DC3000 avrRpm1 on Arabidopsis thaliana
Source: Genes (Basel). 2024 Apr 16;15(4):499. doi: 10.3390/genes15040499 (PMC11050401; doi:10.3390/genes15040499)
Supplement: Supplementary file 1 [file genes-15-00499-s001.zip › Table S4 GO enrichment analyses of the identified lysine succinylated.xlsx]

## Sheet: all
GO Terms Level 1	GO Terms Description	GO Terms Level	GO Terms ID	Mapping	Background	All Mapping	All Background	Fold Enrichment	Fisher' exact test P value	-log10(p value)	Related Protein
Cellular Component	photosystem II	10	GO:0009523	11	12	118	194	1.51	0.0193777	1.71	Q9XF89 P56778 Q9SHR7 Q9LMQ2 P56777 P27202 P23321 Q9XFT3 Q42029 P56761 P04778
Biological Process	protein localization to organelle	6	GO:0033365	6	6	126	206	1.63	0.0499411	1.3	Q9ZU25 Q93ZM7 Q9FI56 P29197 Q9STW6 Q8L7B5
	establishment of protein localization to organelle	7	GO:0072594	6	6	126	206	1.63	0.0499411	1.3	Q9ZU25 Q93ZM7 Q9FI56 P29197 Q9STW6 Q8L7B5
	intracellular protein transport	7	GO:0006886	6	6	126	206	1.63	0.0499411	1.3	Q9ZU25 Q93ZM7 Q9FI56 P29197 Q9STW6 Q8L7B5
