# Supplementary material for: Proteomic Analysis of Lysine Acetylation and Succinylation to Investigate the Pathogenicity of Virulent Pseudomonas syringae pv. tomato DC3000 and Avirulent Line Pseudomonas syringae pv. tomato DC3000 avrRpm1 on Arabidopsis thaliana
Source: Genes (Basel). 2024 Apr 16;15(4):499. doi: 10.3390/genes15040499 (PMC11050401; doi:10.3390/genes15040499)
Supplement: Supplementary file 1 [file genes-15-00499-s001.zip › Table S5 Enrichment analysis of KEGG pathways associated with downregulated differentially modified Kac proteins.xlsx]

## Sheet: Down
KEGG pathway	Mapping	Background	All Mapping	All Background	Fold enrichment	Fisher's exact test p value	-log10(p value)	Related proteins
ath00196 Photosynthesis - antenna proteins	9	9	398	803	2.02	0.00172378	2.76	Q9S7M0 Q9SY97 Q9XF88 Q9XF89 Q9SHR7 Q9LMQ2 Q07473 Q39142 Q8VZ87
ath00670 One carbon pool by folate	7	7	398	803	2.02	0.00715353	2.15	Q9SPK5 A0A2H1ZEA9 Q9SZJ5 Q9SE60 Q94JQ3 O23254 O64767
ath04146 Peroxisome	14	18	398	803	1.57	0.0132203	1.88	Q9T0A0 A0A1P8AWT7 Q8W471 Q56WD9 O78310 F4J504 Q9SRZ6 F4JMK8 Q56YA5 P24704 A0A1P8B564 Q9C7W4 Q9LF46 Q9LRR9
