# Supplementary material for: Proteomic Analysis of Lysine Acetylation and Succinylation to Investigate the Pathogenicity of Virulent Pseudomonas syringae pv. tomato DC3000 and Avirulent Line Pseudomonas syringae pv. tomato DC3000 avrRpm1 on Arabidopsis thaliana
Source: Genes (Basel). 2024 Apr 16;15(4):499. doi: 10.3390/genes15040499 (PMC11050401; doi:10.3390/genes15040499)
Supplement: Supplementary file 1 [file genes-15-00499-s001.zip › Table S6 Enrichment analysis of KEGG pathways associated with downregulated differentially modified Ksu proteins.xlsx]

## Sheet: Down
KEGG pathway	Mapping	Background	All Mapping	All Background	Fold enrichment	Fisher's exact test p value	-log10(p value)	Related proteins
ath00640 Propanoate metabolism	5	5	55	147	2.67	0.00651432	2.19	Q9M5K2 O82662 Q9M7Z1 Q9M5K3 P68209
ath00260 Glycine, serine and threonine metabolism	8	11	55	147	1.94	0.0154179	1.81	Q94B78 A0A2H1ZEA9 Q9LQL0 Q9M5K2 Q9SZJ5 Q9LR30 Q94C74 Q9M5K3
ath00196 Photosynthesis - antenna proteins	4	4	55	147	2.67	0.0182656	1.74	Q9LMQ2 Q9XF89 P04778 Q9SHR7
ath00630 Glyoxylate and dicarboxylate metabolism	13	22	55	147	1.58	0.021994	1.66	Q94B78 P93819 O03042 P10798 A0A2H1ZEA9 Q9LQL0 Q9M5K2 Q9SZJ5 P0DKC4 Q43127 Q9LR30 Q9M5K3 Q94C74
