# Supplementary material for: Proteomic Analysis of Lysine Acetylation and Succinylation to Investigate the Pathogenicity of Virulent Pseudomonas syringae pv. tomato DC3000 and Avirulent Line Pseudomonas syringae pv. tomato DC3000 avrRpm1 on Arabidopsis thaliana
Source: Genes (Basel). 2024 Apr 16;15(4):499. doi: 10.3390/genes15040499 (PMC11050401; doi:10.3390/genes15040499)
Supplement: Supplementary file 1 [file genes-15-00499-s001.zip › Table S7 Protein domain enrichment analysis of acetylated proteins.xlsx]

## Sheet: Down
Domain Description	Mapping	Background	All Mapping	All Backgroud	Fold enrichment	Fisher's exact test p value	-log10(P value)	Related Protein
Glutathione S-transferase, C-terminal-like	19	24	568	1380	1.92	0.000150839	3.82	Q8LE52 Q8L7C9 O80852 P46421 A0A1P8AUX6 P46422 P42760 A8MRC4 Q96324 O82462 Q9SRY5 Q9FE46 Q9FVT2 O04487 Q96266 Q9M2W2 P42761 Q9SCX3 Q9FWR4
Glutathione S-transferase, C-terminal	11	12	568	1380	2.23	0.000408015	3.39	O80852 Q9FE46 P46422 Q9FVT2 O04487 P42760 Q96266 Q96324 P42761 O82462 Q9SRY5
Glutathione S-transferases Phi, C-terminal	8	8	568	1380	2.43	0.000799978	3.1	O80852 P42760 Q96266 Q96324 Q9FE46 P42761 P46422 Q9SRY5
Glutathione S-transferase, N-terminal	16	21	568	1380	1.85	0.00111816	2.95	Q8LE52 Q8L7C9 O80852 P46421 A0A1P8AUX6 P46422 P42760 Q96324 Q9SRY5 Q9FE46 O04487 Q9FVT2 Q96266 Q9M2W2 P42761 Q9FWR4
Translation protein SH3-like domain	10	12	568	1380	2.02	0.00349321	2.46	Q9C9C6 P92959 P51419 P56791 Q9T043 Q93VP3 Q9FZ76 P51414 Q9FDZ9 Q42064
Pyridine nucleotide-disulphide oxidoreductase, dimerisation domain	6	6	568	1380	2.43	0.0047867	2.32	Q9M5K2 P42770 P48641 A8MS68 F4JLP5 Q9M5K3
FAD/NAD-linked reductase, dimerisation domain	6	6	568	1380	2.43	0.0047867	2.32	Q9M5K2 P42770 P48641 A8MS68 F4JLP5 Q9M5K3
Chlorophyll a/b binding protein domain	9	11	568	1380	1.99	0.00721863	2.14	Q9S7M0 Q9SY97 Q9XF88 Q9XF89 Q9SHR7 Q9LMQ2 Q07473 Q39142 Q8VZ87
Ribosomal protein L2 domain 2	9	11	568	1380	1.99	0.00721863	2.14	Q9C9C6 P92959 P51419 P56791 Q9T043 Q93VP3 Q9FZ76 Q42064 P51414
Zinc-binding ribosomal protein	5	5	568	1380	2.43	0.0116904	1.93	Q8RXU5 Q8LFH7 F4JUQ4 P56796 Q8L953
Nucleic acid-binding, OB-fold	11	16	568	1380	1.67	0.0234898	1.63	Q9LK47 Q9SZD6 Q9S7G6 Q9ZPI1 P16181 P56791 P49201 Q9SR73 Q93VP3 P16180 Q42064
GroEL-like apical domain	5	6	568	1380	2.02	0.0462091	1.34	Q9LJE4 P21238 Q9SF16 P21240 P28769
GroEL-like equatorial domain	5	6	568	1380	2.02	0.0462091	1.34	Q9LJE4 P21238 Q9SF16 P21240 P28769
