# Supplementary material for: Proteomic Analysis of Lysine Acetylation and Succinylation to Investigate the Pathogenicity of Virulent Pseudomonas syringae pv. tomato DC3000 and Avirulent Line Pseudomonas syringae pv. tomato DC3000 avrRpm1 on Arabidopsis thaliana
Source: Genes (Basel). 2024 Apr 16;15(4):499. doi: 10.3390/genes15040499 (PMC11050401; doi:10.3390/genes15040499)
Supplement: Supplementary file 1 [file genes-15-00499-s001.zip › Table S8 Protein domain enrichment analysis of succinylated proteins.xlsx]

## Sheet: Down
Domain Description	Mapping	Background	All Mapping	All Backgroud	Fold enrichment	Fisher's exact test p value	-log10(P value)	Related Protein
ATPase, F1/V1/A1 complex, alpha/beta subunit, nucleotide-binding domain	4	4	68	189	2.78	0.0158149	1.8	P83484 P56757 P92549 P19366
ATPase, F1/V1/A1 complex, alpha/beta subunit, N-terminal domain	4	4	68	189	2.78	0.0158149	1.8	P83484 P56757 P92549 P19366
Chlorophyll a/b binding protein domain	4	4	68	189	2.78	0.0158149	1.8	Q9LMQ2 Q9XF89 P04778 Q9SHR7
Transketolase-like, pyrimidine-binding domain	3	3	68	189	2.78	0.045255	1.34	Q9FLH2 Q8RWV0 F4IWV2
