# Supplementary material for: Proteomic Analysis of Lysine Acetylation and Succinylation to Investigate the Pathogenicity of Virulent Pseudomonas syringae pv. tomato DC3000 and Avirulent Line Pseudomonas syringae pv. tomato DC3000 avrRpm1 on Arabidopsis thaliana
Source: Genes (Basel). 2024 Apr 16;15(4):499. doi: 10.3390/genes15040499 (PMC11050401; doi:10.3390/genes15040499)
Supplement: Supplementary file 1 [file genes-15-00499-s001.zip › Table S9 GO-based enrichment analysis of identified downregulated differentially modified Kac proteins.xlsx]

## Sheet: Down
GO Terms Level 1	GO Terms Description	GO Terms Level	GO Terms ID	Mapping	Background	All Mapping	All Background	Fold Enrichment	Fisher' exact test P value	-log10(p value)	Related Protein
Molecular Function	structural constituent of ribosome	3	GO:0003735	88	122	609	1447	1.71	2.24599e-12	11.65	Q9FLN4 P49200 Q9SKX4 Q9T043 P56797 F4KGU2 Q9FZ76 P51413 F4JUQ4 P51414 Q9ZUT9 Q8LD46 Q9SGA6 Q9SF53 P92959 Q9M0E2 P16181 Q9FKZ4 P60040 Q8LBI1 Q680P8 O04603 Q8LD03 Q42064 P49209 Q9LY66 Q9CAV0 Q9C9C6 Q9LRX8 Q940B0 Q9LYK9 P56798 Q9LXG1 P49690 Q9XJ27 P56791 P49201 Q9SR73 Q8RXU5 Q9LK61 Q9FE65 O22795 P17094 Q9SKZ3 F4JWM1 Q9ASV6 A0A1P8AY36 P16180 Q8VZB9 P51427 Q93VT9 P25864 P61845 A0A1I9LMY7 Q9SX68 Q9SYL9…
	structural molecule activity	2	GO:0005198	91	139	609	1447	1.56	4.45714e-09	8.35	Q9FLN4 P49200 Q9SKX4 Q9T043 P56797 F4KGU2 Q9FZ76 P51413 F4JUQ4 P51414 Q9ZUT9 Q8LD46 Q9S7M0 Q9SGA6 Q9SF53 P92959 Q9M0E2 P16181 Q9FKZ4 P60040 Q8LBI1 Q680P8 O04603 Q8LD03 Q42064 P49209 Q9LY66 Q9CAV0 Q9C9C6 Q9LRX8 Q940B0 Q9LYK9 P56798 Q9LXG1 P49690 Q9XJ27 P56791 P49201 Q9SR73 Q8RXU5 Q9LK61 Q9FE65 O22795 P17094 Q9SKZ3 Q9C4Z6 F4JWM1 Q9ASV6 A0A1P8AY36 P16180 Q8VZB9 P51427 Q93VT9 P25864 P61845 A0A1I9LMY7…
	chlorophyll binding	5	GO:0016168	14	14	609	1447	2.38	5.01304e-06	5.3	Q9S7M0 P56767 Q9SY97 Q9XF88 Q9XF89 P56778 P56766 Q9SHR7 Q9LMQ2 P56777 Q07473 Q39142 Q8VZ87 P56761
	mRNA binding	6	GO:0003729	48	75	609	1447	1.52	7.15962e-05	4.15	Q8L7S8 Q8L719 P49200 Q9SYL9 Q9FLT0 Q9T043 Q8LA13 Q93VG5 Q93ZT6 P51414 Q9ZUT9 Q9ASR1 Q9LK47 Q8L5Y4 Q9SF53 Q9LHP1 Q94JX5 Q9M339 Q9SRX2 P16181 Q9LVT8 Q9FKZ4 P60040 Q8W4H7 Q8LFH7 Q8LD03 P34788 Q9CAV0 Q9C9C6 Q9SZD6 Q9LRX8 Q940B0 Q9LYK9 Q9M9S3 Q9LXG1 Q9LD55 O82762 Q0WPK4 Q9FE65 Q9M9W1 P38666 P17094 Q8LFS6 Q9LUT2 O22791 Q9FJR0 P51427 Q93VT9
	tetrapyrrole binding	4	GO:0046906	29	41	609	1447	1.68	0.000161217	3.79	A0A1P8AWT7 Q9SHG8 P56767 A8MRF4 P56771 Q9XF89 P56777 Q07473 Q39161 P24101 Q9SMU8 P56761 Q42342 Q9LZ66 Q9S7M0 Q9SY97 Q9XF88 F4HU93 P56778 P56766 Q9SHR7 Q96242 Q9LMQ2 F4JFY4 P56773 Q39142 A0A1P8B564 A0A1P8APU0 Q8VZ87
	pigment binding	3	GO:0031409	9	9	609	1447	2.38	0.000400288	3.4	Q9S7M0 Q9SY97 Q9XF88 Q9XF89 Q9SHR7 Q9LMQ2 Q07473 Q39142 Q8VZ87
	antioxidant activity	2	GO:0016209	27	41	609	1447	1.56	0.00159382	2.8	A0A1P8AWT7 Q8LE52 O80852 Q9SYT0 A8MRF4 O64764 Q9SEU6 Q96291 P46422 O78310 Q9XFH8 P42770 P24101 P52032 Q949U7 Q9SMU8 A0A1I9LR27 F4HU93 F4J504 Q96266 F4JFY4 O81210 P48641 P24704 A0A1P8B564 A0A1P8APU0 Q9FWR4
	rRNA binding	6	GO:0019843	26	41	609	1447	1.51	0.00428812	2.37	P25864 P56804 P56798 P61845 Q9SX68 Q9LXG1 Q9SKX4 P49690 Q9XJ27 Q9FY50 Q8LD46 P92959 P56808 Q9M385 P16181 Q9FKZ4 Q8LBI1 Q9ASV6 Q93VH9 Q8LFH7 P34788 O04603 P16180 P49209 P59223 Q9LY66
Cellular Component	ribosome	8	GO:0005840	115	163	571	1303	1.61	1.61575e-13	12.79	P54609 Q9FLN4 P49200 Q9SKX4 Q9T043 Q9C5C2 P56797 F4KGU2 Q9FZ76 P51413 P49692 F4JUQ4 P51414 Q9ZUT9 Q8LD46 Q9SGA6 Q9SF53 P92959 Q9M0E2 P16181 Q9FKZ4 P60040 Q8LBI1 Q9LJE4 Q680P8 O04603 Q8LD03 Q42064 P49209 Q9C5Z2 Q9LY66 Q42112 Q9CAV0 Q9C9C6 Q9LRX8 Q940B0 Q9LYK9 P56798 P37702 Q9LXG1 P49690 Q9XJ27 P56791 P49201 Q9SR73 Q8RXU5 Q9LK61 Q94K97 O81148 Q9FE65 O22795 P17094 Q9SKZ3 Q9C4Z6 F4JWM1 Q9ASV6 A0A1P8A…
	cytosolic ribosome	10	GO:0022626	89	119	571	1303	1.71	6.61824e-13	12.18	P54609 P49200 Q9T043 Q9C5C2 Q9FZ76 P51413 P49692 P51414 Q9ZUT9 Q8LD46 Q9SGA6 Q9SF53 Q9M0E2 P16181 Q9FKZ4 P60040 Q8LBI1 Q9LJE4 Q680P8 O04603 Q8LD03 Q42064 P49209 Q9LY66 Q42112 Q9CAV0 Q9C9C6 Q9LRX8 Q940B0 Q9LYK9 P56798 P37702 Q9LXG1 P49690 P56791 P49201 Q9SR73 Q8RXU5 Q94K97 O81148 Q9FE65 O22795 P17094 Q9SKZ3 Q9C4Z6 P16180 Q8VZB9 P51427 Q93VT9 Q9LRR9 P61845 P21238 P21240 Q56WN1 Q9ZQ18 P42798 Q93VG5 …
	cytosolic part	9	GO:0044445	94	129	571	1303	1.66	1.9488e-12	11.71	P54609 P49200 Q9SLA8 Q9T043 Q9C5C2 Q9FZ76 P51413 P49692 P51414 Q9ZUT9 Q8LD46 Q9SGA6 Q9SF53 Q9M0E2 P16181 Q9FKZ4 P60040 Q8LBI1 Q9LJE4 Q680P8 O04603 Q8LD03 Q42064 P49209 Q9LY66 Q42112 Q9CAV0 Q9C9C6 Q9LRX8 Q940B0 Q9LYK9 P56798 Q9SF16 P37702 Q9LXG1 P49690 P56791 P49201 Q9SR73 Q8RXU5 Q9C9C4 Q94K97 O81148 P28769 Q9FE65 O22795 P17094 Q9SKZ3 Q9C4Z6 P16180 Q8VZB9 P51427 Q93VT9 Q9LRR9 P61845 P21238 P21240 …
	ribosomal subunit	9	GO:0044391	73	101	571	1303	1.65	1.64178e-09	8.78	P49200 Q9T043 P56797 Q9FZ76 P51413 P49692 P51414 Q9ZUT9 Q8LD46 Q9SGA6 Q9SF53 Q9M0E2 P16181 Q9FKZ4 P60040 Q8LBI1 Q680P8 Q8LD03 Q42064 P49209 Q9LY66 Q9CAV0 Q9C9C6 Q9LRX8 Q940B0 Q9LYK9 P56798 Q9LXG1 P49690 Q9XJ27 P56791 P49201 Q9SR73 Q8RXU5 Q9LK61 Q94K97 Q9FE65 P17094 O22795 Q9SKZ3 P16180 Q8VZB9 P51427 Q93VT9 P25864 P61845 Q9ZQ18 P42798 Q93VG5 P51422 P49211 Q9LHP1 P56808 Q9M339 Q9SRX2 Q8L953 P51419 …
	cytosolic large ribosomal subunit	11	GO:0022625	42	50	571	1303	1.92	2.91671e-09	8.54	P61845 Q9T043 Q9ZQ18 Q9FZ76 P51413 P49692 P51414 P51422 Q8LD46 P49211 Q9SF53 Q9LHP1 Q9M0E2 Q9SRX2 P51419 Q9FKZ4 P60040 Q8LBI1 Q8LFH7 Q42064 P49209 Q9FDZ9 Q9LY66 Q9C9C6 Q9LRX8 Q940B0 P49690 Q9STR1 P56791 Q8RXU5 Q9M9W1 Q9FE65 Q9LR33 P38666 P17094 O22795 Q9M385 O82204 Q9LZH9 Q8VZB9 Q93VT9 Q9LZ57
	large ribosomal subunit	10	GO:0015934	44	57	571	1303	1.76	1.66993e-07	6.78	P25864 P61845 Q9T043 Q9ZQ18 Q9FZ76 P51413 P49692 P51414 P51422 Q8LD46 P49211 Q9SF53 Q9LHP1 Q9M0E2 Q9SRX2 P51419 Q9FKZ4 P60040 Q8LBI1 Q8LFH7 Q42064 P49209 Q9FDZ9 Q9LY66 Q9C9C6 Q9LRX8 Q940B0 P49690 Q9STR1 P56791 Q8RXU5 Q9FY50 Q9M9W1 Q9FE65 Q9LR33 P38666 P17094 O22795 Q9M385 O82204 Q9LZH9 Q8VZB9 Q93VT9 Q9LZ57
	photosystem	9	GO:0009521	29	37	571	1303	1.79	1.50795e-05	4.82	P56767 Q9SHE8 Q9XF89 P49107 Q9S7H1 P56777 P27202 P23321 Q07473 Q9XFT3 Q9S841 P56761 Q9S7M0 Q9SY97 Q9XF88 Q9SGH4 P82538 P56778 Q9SUI6 F4JM05 P56766 Q9SHR7 Q9LMQ2 Q39142 Q42029 Q9S831 Q41932 Q8VZ87 A0A1P8B6D0
	photosystem I	10	GO:0009522	17	20	571	1303	1.94	0.000168855	3.77	Q9S7M0 P56767 Q9SY97 Q9XF88 Q9SHE8 Q9XF89 Q9SUI6 P56766 Q9SHR7 P49107 Q9LMQ2 Q9S7H1 Q07473 Q39142 Q9S831 Q8VZ87 A0A1P8B6D0
Biological Process	amide biosynthetic process	6	GO:0043604	118	181	591	1393	1.54	3.19767e-11	10.5	Q9SPK5 Q9FLN4 P49200 Q9SKX4 P46416 Q94K73 Q9T043 P56797 F4KGU2 Q9FZ76 P51413 P49692 F4JUQ4 P51414 Q9ZUT9 O82462 Q8LD46 Q9ASR1 Q9SGA6 Q9SF53 P92959 Q9M0E2 P16181 Q9SI75 Q9LHH7 Q9FKZ4 Q9FVT2 P60040 Q8LBI1 Q8W4H7 Q680P8 O04603 Q8LD03 Q42064 P49209 Q9C5Z2 Q9LY66 Q9CAV0 Q9C9C6 Q9SZD6 Q9LRX8 Q940B0 Q9LYK9 P17745 P56798 A0A1I9LNS4 Q9LXG1 P49690 Q9XJ27 P56791 Q9FK25 P49201 Q9LD55 Q9SR73 Q8RXU5 Q9SR15 Q9L…
	peptide biosynthetic process	7	GO:0043043	113	174	591	1393	1.53	1.37186e-10	9.86	Q9FLN4 P49200 Q9SKX4 P46416 Q94K73 Q9T043 P56797 F4KGU2 Q9FZ76 P51413 P49692 F4JUQ4 P51414 Q9ZUT9 O82462 Q8LD46 Q9ASR1 Q9SGA6 Q9SF53 P92959 Q9M0E2 P16181 Q9SI75 Q9FKZ4 Q9FVT2 P60040 Q8LBI1 Q8W4H7 Q680P8 O04603 Q8LD03 Q42064 P49209 Q9C5Z2 Q9LY66 Q9CAV0 Q9C9C6 Q9SZD6 Q9LRX8 Q940B0 Q9LYK9 P17745 P56798 A0A1I9LNS4 Q9LXG1 P49690 Q9XJ27 P56791 P49201 Q9LD55 Q9SR73 Q8RXU5 Q9SR15 Q9LK61 Q9FE65 O22795 P17…
	peptide metabolic process	6	GO:0006518	115	179	591	1393	1.51	2.55687e-10	9.59	Q9FLN4 P49200 Q9SKX4 P46416 Q94K73 Q9T043 P56797 F4KGU2 Q9FZ76 P51413 P49692 F4JUQ4 P51414 Q9ZUT9 O82462 Q8LD46 Q9ASR1 Q9SGA6 Q9SF53 P92959 Q9M0E2 P16181 Q9SI75 Q9FKZ4 Q9FVT2 P60040 Q8LBI1 Q8W4H7 Q680P8 O04603 Q8LD03 Q42064 P49209 Q9C5Z2 Q9LY66 Q9CAV0 Q9C9C6 Q9SZD6 Q9LRX8 Q940B0 Q9LYK9 P17745 P56798 A0A1I9LNS4 Q9LXG1 P49690 Q9XJ27 P56791 P49201 Q9LD55 Q9SR73 Q8RXU5 Q9SR15 Q9LK61 Q9FE65 O22795 P17…
	defense response to bacterium	7	GO:0042742	41	61	591	1393	1.58	5.7612e-05	4.24	P31265 Q9LM66 O23628 Q96291 Q8LPS2 P27140 Q8W493 Q9SRZ6 O80934 P42760 P23321 P24101 Q9SRY5 Q43316 P25697 P46283 Q9LJG3 P10896 P24704 Q9LW57 Q9SUR0 P22953 Q9SCX3 O80852 P43082 Q9LUV2 P46422 Q42529 Q42139 Q9FX54 Q949U7 Q9SMU8 Q9ZR03 Q96266 Q93VP3 P46309 Q9FJR0 Q42029 O04203 Q9LRR9 O49006
	response to bacterium	6	GO:0009617	47	73	591	1393	1.52	8.61259e-05	4.06	P31265 Q9LM66 O23628 Q96291 Q8LPS2 P27140 Q8W493 Q9SRZ6 O80934 P42760 P23321 P24101 Q39101 Q9SRY5 Q43316 P25697 P46283 Q9LJG3 P10896 Q8VZG2 P24704 Q9LW57 Q9SUR0 P22953 Q9SCX3 O80852 Q9LD28 P43082 Q9LUV2 Q9SAJ4 P46422 Q42529 Q42139 Q9FX54 Q949U7 Q9SMU8 P38418 Q9SRH5 Q9ZR03 Q96266 Q93VP3 P46309 Q9FJR0 Q42029 O04203 Q9LRR9 O49006
	ribosomal large subunit biogenesis	6	GO:0042273	17	20	591	1393	2	0.000104006	3.98	P38666 Q9C9C6 P61845 Q9SF53 Q9LHP1 P60040 Q8LBI1 Q9ZQ18 Q9FZ76 P49692 Q9LZH9 Q8VZB9 O04603 Q9SH88 Q93VT9 Q9LY66 Q8LD46
	photosynthesis, light harvesting in photosystem I	7	GO:0009768	9	9	591	1393	2.36	0.000429924	3.37	Q9S7M0 Q9SY97 Q9XF88 Q9XF89 Q9SHR7 Q9LMQ2 Q07473 Q39142 Q8VZ87
	response to jasmonic acid	6	GO:0009753	11	13	591	1393	1.99	0.00224804	2.65	O04309 P38418 P46416 Q9C9D0 Q96242 P10896 Q9FZA2 P46309 Q9FJR0 Q9ZV24 Q9FWR4
	photosynthesis, light harvesting	6	GO:0009765	11	13	591	1393	1.99	0.00224804	2.65	Q9S7M0 Q9SY97 Q9XF88 Q39102 Q9FH02 Q9XF89 Q9SHR7 Q9LMQ2 Q07473 Q39142 Q8VZ87
	response to red light	7	GO:0010114	7	7	591	1393	2.36	0.00242395	2.62	P10796 Q9XF88 Q07473 Q8H110 P10795 Q9XF89 Q9SHR7
	response to zinc ion	6	GO:0010043	10	12	591	1393	1.96	0.00457129	2.34	P93819 O80852 P46422 Q9FVT2 O50008 Q9SRZ6 P48491 Q39101 Q42112 Q9FWR4
	response to ozone	6	GO:0010193	6	6	591	1393	2.36	0.00574703	2.24	Q9FGY9 P46309 P24704 Q9LW57 Q9FWR4 O78310
	response to blue light	6	GO:0009637	7	8	591	1393	2.06	0.0122422	1.91	P10796 Q9XF88 Q07473 Q8H110 P10795 Q9XF89 Q9SHR7
	toxin catabolic process	6	GO:0009407	10	13	591	1393	1.81	0.0123154	1.91	Q8L7C9 O80852 P46421 Q9FE46 P46422 P42760 Q96266 Q96324 P42761 Q9SRY5
