# Supplementary material for: Proteomic Analysis of Lysine Acetylation and Succinylation to Investigate the Pathogenicity of Virulent Pseudomonas syringae pv. tomato DC3000 and Avirulent Line Pseudomonas syringae pv. tomato DC3000 avrRpm1 on Arabidopsis thaliana
Source: Genes (Basel). 2024 Apr 16;15(4):499. doi: 10.3390/genes15040499 (PMC11050401; doi:10.3390/genes15040499)
Supplement: Supplementary file 1 [file genes-15-00499-s001.zip › Table S10 GO-based enrichment analysis of identified downregulated differentially modified Ksu proteins.xlsx]

## Sheet: Down
GO Terms Level 1	GO Terms Description	GO Terms Level	GO Terms ID	Mapping	Background	All Mapping	All Background	Fold Enrichment	Fisher' exact test P value	-log10(p value)	Related Protein
Molecular Function	pigment binding	3	GO:0031409	4	4	71	207	2.92	0.0130765	1.88	Q9LMQ2 Q9XF89 P04778 Q9SHR7
	sulfur compound binding	3	GO:1901681	4	4	71	207	2.92	0.0130765	1.88	O80852 Q9FLH2 P46422 F4IWV2
	peroxidase activity	5	GO:0004601	5	6	71	207	2.43	0.0188447	1.72	O80852 Q9M7T0 Q96291 Q9SMU8 P46422
	peptide binding	4	GO:0042277	3	3	71	207	2.92	0.0392296	1.41	O80852 P46422 Q38867
	amide binding	3	GO:0033218	3	3	71	207	2.92	0.0392296	1.41	O80852 P46422 Q38867
	oxidoreductase activity, acting on NAD(P)H	4	GO:0016651	4	5	71	207	2.33	0.0481191	1.32	Q9FNN5 Q9M5K2 O22769 Q9M5K3
	antioxidant activity	2	GO:0016209	5	7	71	207	2.08	0.0481191	1.32	O80852 Q9M7T0 Q96291 Q9SMU8 P46422
Cellular Component	vacuole	8	GO:0005773	21	36	71	194	1.59	0.00283108	2.55	P31265 Q96293 O80852 P31167 P46422 Q9FMU6 Q9SMU8 Q9FT52 Q9ZU25 P93819 Q9LF98 Q9SF40 Q93ZM7 O50008 Q9LJG3 F4JJ94 Q9C5M0 Q8W4H7 O23255 P29197 Q9LR30
	respiratory chain complex I	6	GO:0045271	6	7	71	194	2.34	0.0103009	1.99	P83484 Q9FNN5 Q9M5K2 Q9C6B3 O22769 Q9M5K3
	mitochondrial respiratory chain complex I	14	GO:0005747	6	7	71	194	2.34	0.0103009	1.99	P83484 Q9FNN5 Q9M5K2 Q9C6B3 O22769 Q9M5K3
	NADH dehydrogenase complex	5	GO:0030964	6	7	71	194	2.34	0.0103009	1.99	P83484 Q9FNN5 Q9M5K2 Q9C6B3 O22769 Q9M5K3
	oxidoreductase complex	4	GO:1990204	13	22	71	194	1.61	0.0197412	1.7	Q9ZU25 Q9FNN5 Q9FLH2 Q9LQL0 O22769 F4IWV2 P83484 Q9M5K2 P27202 Q9FLQ4 P23321 Q9C6B3 Q9M5K3
	mitochondrial membrane	11	GO:0031966	13	22	71	194	1.61	0.0197412	1.7	Q9ZU25 Q9FNN5 Q9LF98 P31167 O22769 P83484 Q9C5M0 Q9M5K2 Q9FMU6 P92549 Q9C6B3 Q9FT52 Q9M5K3
	mitochondrial inner membrane	12	GO:0005743	12	20	71	194	1.64	0.0218344	1.66	Q9ZU25 Q9FNN5 P31167 O22769 P83484 Q9C5M0 Q9M5K2 Q9FMU6 P92549 Q9C6B3 Q9M5K3 Q9FT52
	respiratory chain complex	5	GO:0098803	7	10	71	194	1.91	0.0299259	1.52	Q9ZU25 P83484 Q9FNN5 Q9M5K2 Q9C6B3 O22769 Q9M5K3
Biological Process	response to cadmium ion	6	GO:0046686	22	37	74	206	1.66	0.0011366	2.94	Q94B78 P31265 O80852 Q9M7T0 Q9FLH2 Q944G9 P46422 P68209 Q9SZJ5 O82662 Q8RWV0 Q43127 P93819 Q9LF98 Q93ZM7 Q9STW6 O50008 Q9M5K2 F4JJ94 P29197 Q38867 Q9M5K3
	cell maturation	7	GO:0048469	4	4	74	206	2.78	0.0157906	1.8	P31265 Q96293 P53492 Q9S757
	photosynthesis, light harvesting in photosystem I	7	GO:0009768	4	4	74	206	2.78	0.0157906	1.8	Q9LMQ2 Q9XF89 P04778 Q9SHR7
	plant organ morphogenesis	7	GO:1905392	4	4	74	206	2.78	0.0157906	1.8	P31265 Q96293 P53492 Q9S757
	plant epidermal cell differentiation	6	GO:0090627	4	4	74	206	2.78	0.0157906	1.8	P31265 Q96293 P53492 Q9S757
